# Supplementary material for: Detection of Emerging Vaccine-Related Polioviruses by Deep Sequencing
Source: PubMed Central journal article supplement (PMC5483918; doi:10.1128/jcm.00144-17), 2017-06-23
Supplement: JCM.00144-17_zjm999095566s1.pdf [file JCM.00144-17_zjm999095566s1.pdf]

## SUPPLEMENTAL MATERIAL

### Supplemental Figure Legend

**Figure S1.** Sequence coverage map. Each curve represents the number of reads across each genomic position for one poliovirus strain. Sabin 1, 2, and 3 serotypes are displayed separately. Variants were called only when there were at least 500 reads (dotted line) across >95% of target positions in a given strain.
