# Supplementary material for: Detection of Emerging Vaccine-Related Polioviruses by Deep Sequencing
Source: PubMed Central journal article supplement (PMC5483918; doi:10.1128/jcm.00144-17), 2017-06-23

# Figure S1

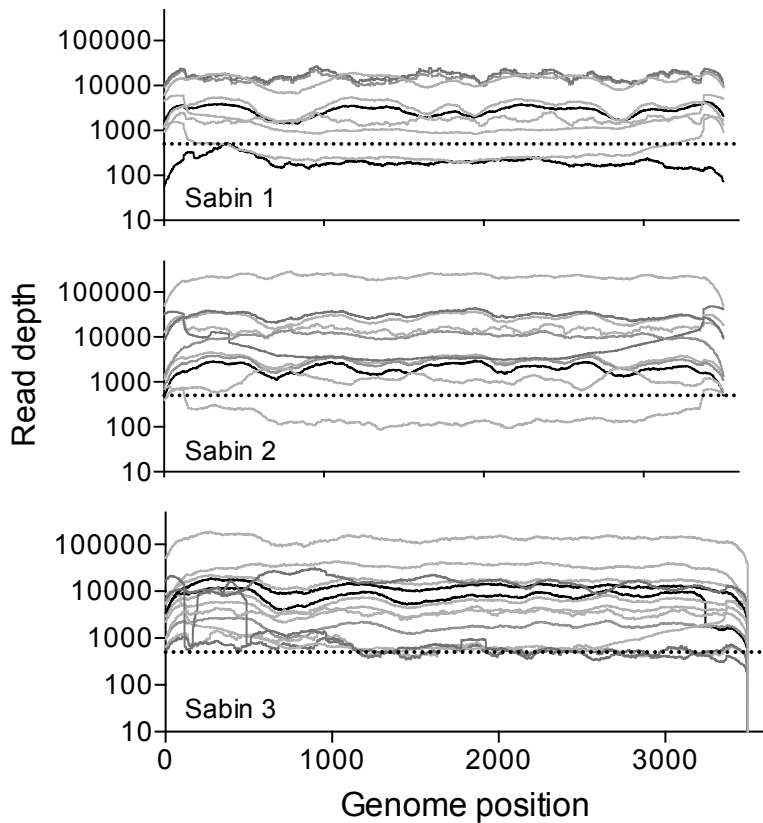

Supplement: JCM.00144-17_zjm999095566s2.pdf [file JCM.00144-17_zjm999095566s2.pdf]
